# Supplementary material for: Matrix effects in simultaneous microwave induced plasma optical emission spectrometry: new perspectives on an old problem
Source: Royal Society of Chemistry journal article supplement (doi:10.1039/d3ja00061c), 2023-01-01
Supplement: d3ja00061c1.pdf [file d3ja00061c1.pdf]

## **Matrix effects in simultaneous microwave induced plasma optical emission spectrometry: new perspectives on an old problem**

Franz Hallwirth <sup>a</sup>, Matthias Wolfgang <sup>a,b</sup>, Helmar Wiltsche <sup>a\*</sup>

a) Graz University of Technology, Institute of Analytical Chemistry and Food Chemistry, Graz, Austria

b) Research Center Pharmaceutical Engineering GmbH, Graz, Austria

\* Corresponding author: [helmar.wiltsche@tugraz.at](mailto:helmar.wiltsche@tugraz.at)

Table S1. Effect of 50 mg L<sup>-1</sup> of a single matrix element (either Al, B, Co, Cr, Cu, Fe, Mn, Ni, Ti, V, Zn, as well as the EIE Li, Na, K, Cs, Mg, Ca, or Ba) on the emission line signal of 105 emission lines of 42 elements (atom and ion lines). Data normalized to the signal obtained for each emission line in diluted (3 % v/v) nitric acid and reported in %. Color coding: blue – signal suppression, red – signal enhancement; RSDs < 2%, n=5, TE: Total line energy (excitation energy + ionization energy); IE: ionization energy; Plasma robustness expressed as the Mg II 280.270 nm / Mg I 285.210 nm ratio; M: matrix element

| Emission Line    | TE, eV | IP, eV | Matrix Elements |     |     |     |     |     |     |     |     |     |     |     |     |     |     |     |     |     |
|------------------|--------|--------|-----------------|-----|-----|-----|-----|-----|-----|-----|-----|-----|-----|-----|-----|-----|-----|-----|-----|-----|
|                  |        |        | Al              | B   | Co  | Cr  | Cu  | Fe  | Mn  | Ni  | Ti  | V   | Zn  | Li  | Na  | K   | Cs  | Mg  | Ca  | Ba  |
| Al I 308.215 nm  | 4.0    | 6.0    | M               | 101 | 100 | 97  | 98  | 99  | 99  | 100 | 99  | 100 | 100 | 84  | 89  | 87  | 93  | 97  | 94  | 100 |
| Al I 394.401 nm  | 3.1    | 6.0    | M               | 101 | 102 | 101 | 102 | 101 | 100 | 102 | 100 | 101 | 103 | 84  | 90  | 88  | 95  | 98  | 98  | 101 |
| Al I 396.152 nm  | 3.1    | 6.0    | M               | 101 | 100 | 100 | 100 | 100 | 100 | 100 | 101 | 101 | 101 | 83  | 88  | 88  | 94  | 97  | 96  | 99  |
| As I 189.042 nm  | 6.6    | 9.8    | 93              | 95  | 96  | 94  | 95  | 93  | 94  | 94  | 94  | 94  | 93  | 94  | 93  | 95  | 93  | 96  | 95  | 95  |
| As I 193.759 nm  | 6.4    | 9.8    | 98              | 97  | 98  | 95  | 97  | 97  | 97  | 96  | 96  | 96  | 97  | 95  | 97  | 96  | 95  | 97  | 95  | 97  |
| B I 249.677 nm   | 5.0    | 8.3    | 96              | M   | 103 | 102 | 102 | 100 | 102 | 102 | 102 | 101 | 103 | 102 | 102 | 102 | 103 | 102 | 104 | 104 |
| B I 249.773 nm   | 5.0    | 8.3    | 97              | M   | 103 | 103 | 102 | 101 | 103 | 102 | 103 | 101 | 102 | 102 | 103 | 102 | 102 | 102 | 104 | 103 |
| Ba II 233.527 nm | 11.0   | 5.2    | 90              | 101 | 98  | 97  | 101 | 96  | 98  | 99  | 102 | 101 | 100 | 71  | 82  | 83  | 92  | 96  | 92  | M   |
| Ba II 455.404 nm | 7.9    | 5.2    | 91              | 101 | 102 | 99  | 101 | 102 | 98  | 101 | 99  | 102 | 102 | 74  | 80  | 85  | 92  | 96  | 92  | M   |
| Be I 234.861 nm  | 5.3    | 9.3    | 99              | 102 | 103 | 102 | 101 | 100 | 102 | 100 | 99  | 99  | 101 | 102 | 102 | 102 | 102 | 100 | 103 | 103 |
| Be II 313.042 nm | 13.0   | 9.3    | 100             | 101 | 100 | 101 | 102 | 100 | 101 | 102 | 98  | 99  | 103 | 99  | 102 | 102 | 104 | 100 | 100 | 104 |
| Bi I 222.825 nm  | 5.6    | 7.3    | 90              | 91  | 87  | 92  | 89  | 87  | 88  | 90  | 87  | 90  | 90  | 80  | 92  | 83  | 89  | 90  | 88  | 86  |
| Bi I 223.061 nm  | 5.6    | 7.3    | 89              | 90  | 89  | 92  | 90  | 89  | 89  | 89  | 91  | 90  | 91  | 84  | 89  | 86  | 90  | 89  | 87  | 90  |
| Bi I 306.772 nm  | 4.0    | 7.3    | 88              | 88  | 90  | 89  | 89  | 89  | 88  | 88  | 89  | 88  | 91  | 85  | 87  | 87  | 88  | 87  | 88  | 89  |
| Ca II 317.933 nm | 13.0   | 6.1    | 85              | 102 | 102 | 97  | 101 | 100 | 99  | 101 | 95  | 101 | 102 | 77  | 81  | 84  | 93  | 95  | M   | 98  |
| Ca II 393.366 nm | 9.3    | 6.1    | 95              | 104 | 106 | 101 | 106 | 103 | 100 | 103 | 94  | 107 | 106 | 75  | 77  | 83  | 94  | 97  | M   | 96  |
| Ca II 396.847 nm | 9.2    | 6.1    | 92              | 101 | 102 | 98  | 101 | 102 | 98  | 102 | 93  | 104 | 103 | 74  | 75  | 81  | 91  | 93  | M   | 95  |
| Cd I 228.802 nm  | 5.4    | 9.0    | 100             | 101 | 100 | 101 | 101 | 99  | 101 | 100 | 101 | 100 | 101 | 100 | 101 | 99  | 101 | 101 | 100 | 100 |
| Cd II 214.438 nm | 15.0   | 9.0    | 100             | 103 | 101 | 102 | 103 | 101 | 103 | 103 | 101 | 101 | 102 | 98  | 100 | 101 | 102 | 101 | 102 | 103 |
| Cd II 226.502 nm | 14.0   | 9.0    | 99              | 103 | 103 | 99  | 102 | 100 | 103 | 102 | 100 | 100 | 102 | 100 | 101 | 100 | 104 | 102 | 99  | 101 |
| Ce II 413.38 nm  | 9.4    | 5.5    | 91              | 100 | 101 | 98  | 101 | 99  | 99  | 100 | 101 | 100 | 101 | 75  | 82  | 84  | 92  | 95  | 91  | 97  |
| Ce II 448.691 nm | 8.6    | 5.5    | 92              | 101 | 100 | 99  | 101 | 99  | 99  | 100 | 101 | 101 | 101 | 76  | 83  | 84  | 92  | 96  | 91  | 97  |
| Co I 344.364 nm  | 4.1    | 7.9    | 101             | 104 | M   | 103 | 100 | 95  | 98  | 101 | 108 | 103 | 104 | 95  | 94  | 90  | 94  | 92  | 103 | 99  |
| Co I 345.35 nm   | 4.0    | 7.9    | 112             | 105 | M   | 102 | 101 | 100 | 99  | 102 | 102 | 99  | 104 | 97  | 98  | 96  | 98  | 94  | 99  | 101 |
| Co II 228.616 nm | 14.0   | 7.9    | 102             | 106 | M   | 101 | 102 | 102 | 101 | 101 | 101 | 102 | 104 | 94  | 99  | 100 | 104 | 97  | 99  | 105 |
| Co II 238.892 nm | 13.0   | 7.9    | 97              | 104 | M   | 100 | 103 | 101 | 102 | 101 | 101 | 100 | 102 | 94  | 98  | 100 | 102 | 96  | 98  | 101 |
| Cr I 357.869 nm  | 3.5    | 6.8    | 96              | 102 | 104 | M   | 102 | 103 | 100 | 102 | 99  | 100 | 100 | 93  | 93  | 94  | 98  | 97  | 97  | 100 |
| Cr I 425.435 nm  | 2.9    | 6.8    | 90              | 97  | 98  | M   | 100 | 100 | 97  | 99  | 102 | 102 | 99  | 85  | 89  | 90  | 95  | 97  | 94  | 97  |
| Cr II 205.552 nm | 13.0   | 6.8    | 95              | 108 | 106 | M   | 103 | 100 | 99  | 103 | 104 | 105 | 107 | 87  | 93  | 91  | 99  | 99  | 97  | 102 |
| Cr II 267.716 nm | 13.0   | 6.8    | 94              | 102 | 104 | M   | 100 | 97  | 95  | 102 | 97  | 101 | 103 | 81  | 92  | 90  | 96  | 95  | 91  | 95  |
| Cr II 283.563 nm | 13.0   | 6.8    | 94              | 102 | 102 | M   | 102 | 96  | 97  | 100 | 98  | 99  | 102 | 82  | 89  | 89  | 96  | 95  | 93  | 96  |
| Cu I 324.754 nm  | 3.8    | 7.7    | 95              | 99  | 100 | 102 | M   | 102 | 100 | 99  | 100 | 102 | 101 | 99  | 102 | 99  | 102 | 99  | 99  | 100 |
| Cu I 327.396 nm  | 3.8    | 7.7    | 99              | 102 | 98  | 101 | M   | 100 | 99  | 98  | 101 | 101 | 99  | 98  | 101 | 100 | 102 | 98  | 99  | 101 |

| Emission Line    | TE,<br>eV | IP,<br>eV | Matrix Elements |     |     |     |     |     |     |     |     |     |     |     |     |     |     |     |     |     |
|------------------|-----------|-----------|-----------------|-----|-----|-----|-----|-----|-----|-----|-----|-----|-----|-----|-----|-----|-----|-----|-----|-----|
|                  |           |           | Al              | B   | Co  | Cr  | Cu  | Fe  | Mn  | Ni  | Ti  | V   | Zn  | Li  | Na  | K   | Cs  | Mg  | Ca  | Ba  |
| Fe II 238.204 nm | 13.0      | 7.9       | 98              | 104 | 102 | 99  | 102 | M   | 101 | 102 | 100 | 100 | 102 | 92  | 96  | 97  | 100 | 99  | 98  | 100 |
| Fe II 239.562 nm | 13.0      | 7.9       | 98              | 105 | 100 | 101 | 103 | M   | 103 | 101 | 102 | 100 | 103 | 92  | 97  | 101 | 102 | 99  | 99  | 101 |
| Fe II 259.941 nm | 13.0      | 7.9       | 98              | 103 | 102 | 100 | 102 | M   | 100 | 101 | 100 | 100 | 102 | 91  | 97  | 98  | 101 | 98  | 97  | 101 |
| Gd II 335.047 nm | 10.0      | 6.1       | 93              | 102 | 102 | 99  | 102 | 99  | 99  | 102 | 100 | 99  | 102 | 80  | 86  | 88  | 94  | 95  | 92  | 98  |
| Gd II 342.247 nm | 10.0      | 6.1       | 93              | 101 | 102 | 99  | 102 | 101 | 99  | 101 | 99  | 101 | 103 | 79  | 86  | 88  | 96  | 95  | 92  | 99  |
| Hf II 232.247 nm | 12.0      | 6.8       | 99              | 104 | 103 | 102 | 105 | 103 | 107 | 106 | 103 | 99  | 105 | 100 | 103 | 95  | 105 | 104 | 101 | 100 |
| Hf II 264.141 nm | 13.0      | 6.8       | 104             | 105 | 104 | 105 | 104 | 103 | 104 | 104 | 104 | 103 | 104 | 95  | 102 | 103 | 106 | 103 | 104 | 104 |
| Hf II 339.98 nm  | 10.0      | 6.8       | 96              | 102 | 103 | 103 | 100 | 101 | 101 | 104 | 101 | 102 | 100 | 93  | 97  | 98  | 94  | 99  | 100 | 101 |
| K I 766.491 nm   | 1.6       | 4.3       | 112             | 98  | 101 | 104 | 99  | 100 | 102 | 99  | 101 | 103 | 101 | 131 | 124 | M   | 114 | 107 | 113 | 105 |
| La II 333.749 nm | 9.7       | 5.6       | 89              | 100 | 103 | 100 | 101 | 100 | 99  | 100 | 100 | 101 | 100 | 73  | 81  | 82  | 92  | 95  | 92  | 98  |
| La II 379.478 nm | 9.1       | 5.6       | 91              | 102 | 102 | 99  | 101 | 100 | 99  | 102 | 100 | 101 | 103 | 74  | 81  | 83  | 92  | 96  | 92  | 99  |
| La II 408.672 nm | 8.6       | 5.6       | 92              | 101 | 102 | 99  | 102 | 100 | 99  | 101 | 100 | 100 | 103 | 76  | 82  | 84  | 92  | 96  | 94  | 100 |
| Li I 670.78 nm   | 1.8       | 5.4       | 88              | 102 | 102 | 101 | 101 | 101 | 99  | 101 | 102 | 103 | 101 | M   | 72  | 73  | 87  | 94  | 105 | 103 |
| Lu II 261.542 nm | 10.0      | 5.4       | 96              | 101 | 102 | 100 | 101 | 101 | 100 | 101 | 99  | 99  | 103 | 87  | 92  | 94  | 99  | 98  | 95  | 100 |
| Lu II 291.139 nm | 11.0      | 5.4       | 97              | 103 | 103 | 99  | 102 | 99  | 100 | 101 | 100 | 99  | 103 | 87  | 94  | 95  | 101 | 98  | 96  | 100 |
| Lu II 307.76 nm  | 11.0      | 5.4       | 96              | 101 | 100 | 99  | 100 | 100 | 99  | 101 | 99  | 100 | 101 | 86  | 93  | 94  | 99  | 97  | 95  | 100 |
| Mg I 285.213 nm  | 4.3       | 7.6       | 97              | 101 | 102 | 100 | 102 | 101 | 99  | 100 | 101 | 101 | 103 | 87  | 92  | 92  | 97  | M   | 94  | 99  |
| Mg II 280.27 nm  | 12.0      | 7.6       | 96              | 103 | 103 | 100 | 103 | 101 | 100 | 101 | 100 | 100 | 103 | 84  | 90  | 92  | 97  | M   | 94  | 99  |
| Mn I 403.076 nm  | 3.1       | 7.4       | 95              | 100 | 99  | 99  | 99  | 98  | M   | 98  | 101 | 100 | 99  | 88  | 91  | 92  | 96  | 97  | 94  | 97  |
| Mn II 257.611 nm | 12.0      | 7.4       | 96              | 104 | 103 | 100 | 102 | 101 | M   | 102 | 100 | 100 | 103 | 84  | 91  | 93  | 98  | 97  | 94  | 100 |
| Mn II 259.373 nm | 12.0      | 7.4       | 98              | 105 | 102 | 101 | 102 | 101 | M   | 102 | 102 | 100 | 103 | 85  | 91  | 94  | 99  | 98  | 96  | 99  |
| Mo II 202.03 nm  | 13.0      | 7.1       | 101             | 105 | 104 | 108 | 108 | 107 | 112 | 110 | 100 | 101 | 103 | 96  | 106 | 106 | 102 | 104 | 104 | 103 |
| Mo II 281.615 nm | 13.0      | 7.1       | 97              | 101 | 104 | 100 | 103 | 99  | 101 | 100 | 99  | 99  | 103 | 92  | 97  | 97  | 102 | 98  | 98  | 101 |
| Mo II 379.825 nm | 3.3       | 7.1       | 98              | 100 | 101 | 100 | 101 | 99  | 100 | 101 | 100 | 100 | 102 | 96  | 98  | 97  | 99  | 100 | 99  | 100 |
| Na I 588.995 nm  | 2.1       | 5.1       | 97              | 101 | 100 | 100 | 100 | 99  | 98  | 98  | 101 | 100 | 99  | 79  | M   | 85  | 91  | 97  | 104 | 104 |
| Na I 589.592 nm  | 2.1       | 5.1       | 100             | 102 | 102 | 102 | 102 | 102 | 99  | 101 | 103 | 102 | 102 | 82  | M   | 88  | 95  | 99  | 107 | 106 |
| Nb II 269.706 nm | 12.0      | 6.8       | 94              | 101 | 101 | 100 | 102 | 100 | 102 | 100 | 100 | 96  | 101 | 91  | 96  | 98  | 101 | 99  | 99  | 98  |
| Nb II 309.418 nm | 11.0      | 6.8       | 94              | 103 | 101 | 100 | 101 | 100 | 100 | 102 | 99  | 96  | 102 | 91  | 98  | 98  | 102 | 100 | 99  | 102 |
| Nb II 313.079 nm | 11.0      | 6.8       | 95              | 102 | 103 | 102 | 104 | 101 | 101 | 102 | 93  | 100 | 103 | 93  | 98  | 100 | 102 | 99  | 99  | 102 |
| Ni I 232.003 nm  | 5.3       | 7.6       | 99              | 103 | 102 | 99  | 102 | 101 | 98  | M   | 102 | 101 | 100 | 94  | 99  | 99  | 101 | 95  | 100 | 101 |
| Ni I 352.454 nm  | 3.5       | 7.6       | 95              | 99  | 97  | 94  | 98  | 98  | 98  | M   | 101 | 99  | 96  | 93  | 98  | 97  | 97  | 93  | 95  | 98  |
| Pb I 368.346 nm  | 4.3       | 7.4       | 88              | 95  | 94  | 95  | 95  | 95  | 94  | 95  | 96  | 95  | 94  | 81  | 85  | 86  | 91  | 91  | 89  | 92  |
| Pb I 405.778 nm  | 4.4       | 7.4       | 91              | 95  | 94  | 95  | 95  | 93  | 94  | 93  | 96  | 95  | 95  | 84  | 86  | 87  | 91  | 92  | 89  | 93  |
| Pd I 324.27 nm   | 4.6       | 8.3       | 105             | 102 | 100 | 103 | 105 | 104 | 101 | 101 | 103 | 101 | 101 | 97  | 105 | 100 | 103 | 99  | 102 | 101 |
| Pd I 340.458 nm  | 4.5       | 8.3       | 97              | 98  | 102 | 101 | 100 | 101 | 100 | 98  | 102 | 101 | 99  | 96  | 98  | 98  | 98  | 97  | 99  | 99  |
| Pt I 299.797 nm  | 4.2       | 9.0       | 98              | 100 | 100 | 101 | 101 | 98  | 99  | 100 | 101 | 98  | 100 | 100 | 100 | 100 | 101 | 99  | 98  | 100 |
| Pt I 306.471 nm  | 4.0       | 9.0       | 99              | 98  | 99  | 99  | 99  | 98  | 98  | 99  | 99  | 98  | 98  | 96  | 97  | 98  | 97  | 98  | 98  | 100 |
| Rh I 343.489 nm  | 3.6       | 7.5       | 100             | 101 | 101 | 102 | 100 | 101 | 99  | 100 | 100 | 100 | 101 | 96  | 98  | 98  | 102 | 96  | 95  | 102 |
| Rh I 369.236 nm  | 3.4       | 7.5       | 98              | 101 | 99  | 99  | 100 | 99  | 99  | 99  | 101 | 98  | 100 | 94  | 97  | 96  | 99  | 96  | 97  | 99  |
| Sb I 206.833 nm  | 6.0       | 8.6       | 95              | 97  | 97  | 96  | 97  | 93  | 95  | 95  | 97  | 97  | 99  | 95  | 96  | 95  | 97  | 96  | 95  | 97  |
| Sb I 217.581 nm  | 5.7       | 8.6       | 94              | 97  | 96  | 95  | 96  | 94  | 96  | 97  | 95  | 96  | 97  | 95  | 96  | 95  | 96  | 96  | 95  | 97  |
| Sb I 231.147 nm  | 5.4       | 8.6       | 95              | 97  | 88  | 95  | 98  | 96  | 97  | 98  | 97  | 96  | 97  | 96  | 97  | 94  | 98  | 97  | 96  | 96  |

| Emission Line     | TE,<br>eV | IP,<br>eV | Matrix Elements |     |     |     |     |     |     |     |     |     |     |     |     |     |     |     |     |     |
|-------------------|-----------|-----------|-----------------|-----|-----|-----|-----|-----|-----|-----|-----|-----|-----|-----|-----|-----|-----|-----|-----|-----|
|                   |           |           | Al              | B   | Co  | Cr  | Cu  | Fe  | Mn  | Ni  | Ti  | V   | Zn  | Li  | Na  | K   | Cs  | Mg  | Ca  | Ba  |
| Sc II 361.384 nm  | 10.0      | 6.6       | 96              | 103 | 102 | 100 | 103 | 101 | 100 | 102 | 100 | 101 | 103 | 77  | 91  | 93  | 99  | 97  | 95  | 100 |
| Sc II 424.683 nm  | 9.8       | 6.6       | 92              | 100 | 100 | 99  | 100 | 99  | 98  | 100 | 98  | 99  | 100 | 76  | 89  | 90  | 96  | 95  | 92  | 98  |
| Se I 196.09 nm    | 6.3       | 9.8       | 91              | 97  | 99  | 97  | 94  | 92  | 95  | 96  | 96  | 94  | 96  | 94  | 96  | 96  | 98  | 97  | 96  | 98  |
| Se I 203.985 nm   | 6.3       | 9.8       | 95              | 98  | 104 | 92  | 95  | 87  | 83  | 88  | 100 | 99  | 99  | 91  | 98  | 96  | 95  | 98  | 96  | 98  |
| Sr II 407.771 nm  | 10.0      | 5.7       | 88              | 99  | 98  | 96  | 99  | 98  | 96  | 98  | 97  | 95  | 98  | 72  | 79  | 82  | 89  | 92  | 89  | 96  |
| Sr II 421.552 nm  | 10.0      | 5.7       | 92              | 103 | 102 | 97  | 102 | 102 | 100 | 102 | 102 | 101 | 104 | 74  | 82  | 84  | 93  | 96  | 93  | 100 |
| Ta II 240.063 nm  | 13.0      | 7.5       | 92              | 102 | 101 | 102 | 99  | 96  | 103 | 101 | 101 | 100 | 105 | 92  | 99  | 100 | 100 | 101 | 100 | 96  |
| Ta II 268.517 nm  | 12.0      | 7.5       | 96              | 101 | 103 | 101 | 102 | 101 | 103 | 102 | 101 | 99  | 102 | 94  | 99  | 101 | 105 | 100 | 99  | 102 |
| Tb II 350.917 nm  | 9.4       | 5.9       | 89              | 98  | 94  | 90  | 98  | 94  | 97  | 95  | 100 | 98  | 99  | 76  | 85  | 86  | 90  | 94  | 90  | 95  |
| Tb II 370.286 nm  | 9.3       | 5.9       | 92              | 100 | 101 | 97  | 101 | 99  | 98  | 100 | 98  | 99  | 100 | 80  | 86  | 88  | 95  | 96  | 91  | 98  |
| Ti II 307.864 nm  | 11.0      | 6.8       | 95              | 102 | 100 | 98  | 100 | 100 | 99  | 101 | M   | 99  | 101 | 86  | 93  | 94  | 98  | 98  | 96  | 100 |
| Ti II 334.941 nm  | 11.0      | 6.8       | 96              | 101 | 101 | 100 | 101 | 100 | 99  | 101 | M   | 99  | 103 | 87  | 93  | 95  | 101 | 97  | 96  | 102 |
| Ti II 336.121 nm  | 11.0      | 6.8       | 92              | 104 | 104 | 101 | 100 | 103 | 100 | 102 | M   | 100 | 101 | 87  | 97  | 96  | 99  | 98  | 99  | 100 |
| Tm II 313.126 nm  | 10.0      | 6.2       | 94              | 99  | 100 | 99  | 101 | 100 | 100 | 102 | 99  | 100 | 103 | 83  | 90  | 92  | 98  | 97  | 92  | 100 |
| Tm II 342.508 nm  | 9.8       | 6.2       | 91              | 101 | 102 | 98  | 101 | 100 | 99  | 100 | 99  | 99  | 101 | 81  | 88  | 91  | 95  | 96  | 93  | 98  |
| Tm II 346.22 nm   | 9.8       | 6.2       | 94              | 101 | 100 | 97  | 100 | 99  | 99  | 100 | 100 | 99  | 102 | 80  | 88  | 91  | 96  | 96  | 92  | 99  |
| V II 292.464 nm   | 11.0      | 6.7       | 96              | 102 | 103 | 99  | 103 | 96  | 99  | 100 | 99  | M   | 101 | 87  | 94  | 95  | 100 | 97  | 97  | 99  |
| V II 309.311 nm   | 11.0      | 6.7       | 96              | 97  | 99  | 99  | 101 | 99  | 100 | 101 | 100 | M   | 103 | 87  | 93  | 97  | 100 | 99  | 96  | 102 |
| V II 311.071 nm   | 11.0      | 6.7       | 96              | 103 | 101 | 99  | 101 | 99  | 101 | 102 | 100 | M   | 102 | 88  | 98  | 95  | 101 | 99  | 98  | 101 |
| W I 400.875 nm    | 3.5       | 7.9       | 92              | 97  | 98  | 97  | 96  | 97  | 97  | 95  | 98  | 96  | 96  | 94  | 96  | 95  | 95  | 97  | 98  | 99  |
| W II 239.709 nm   | 14.0      | 7.9       | 99              | 105 | 98  | 106 | 97  | 108 | 98  | 97  | 102 | 100 | 97  | 96  | 97  | 112 | 109 | 100 | 100 | 106 |
| Y II 360.073 nm   | 9.8       | 6.2       | 94              | 103 | 104 | 101 | 103 | 103 | 100 | 103 | 98  | 99  | 102 | 72  | 87  | 90  | 97  | 96  | 94  | 100 |
| Y II 371.03 nm    | 9.7       | 6.2       | 93              | 101 | 102 | 98  | 102 | 100 | 99  | 101 | 99  | 99  | 102 | 70  | 86  | 89  | 95  | 95  | 92  | 98  |
| Y II 377.433 nm   | 9.6       | 6.2       | 93              | 101 | 102 | 99  | 101 | 100 | 99  | 101 | 99  | 100 | 102 | 69  | 87  | 89  | 95  | 95  | 92  | 99  |
| Zn I 213.856 nm   | 5.8       | 9.4       | 104             | 103 | 101 | 102 | 102 | 100 | 101 | 100 | 102 | 103 | M   | 102 | 103 | 101 | 102 | 101 | 101 | 102 |
| Zn II 202.548 nm  | 16.0      | 9.4       | 98              | 105 | 100 | 98  | 102 | 99  | 96  | 102 | 99  | 102 | M   | 97  | 100 | 99  | 101 | 97  | 98  | 101 |
| Zn II 206.191 nm  | 15.0      | 9.4       | 102             | 105 | 102 | 100 | 98  | 99  | 93  | 98  | 101 | 103 | M   | 99  | 100 | 103 | 102 | 100 | 99  | 105 |
| Zr II 339.198 nm  | 10.0      | 6.6       | 96              | 101 | 102 | 100 | 101 | 100 | 100 | 101 | 99  | 100 | 103 | 89  | 94  | 96  | 101 | 98  | 96  | 102 |
| Zr II 343.823 nm  | 10.0      | 6.6       | 95              | 100 | 101 | 98  | 100 | 99  | 100 | 100 | 98  | 98  | 101 | 87  | 93  | 95  | 98  | 98  | 95  | 100 |
| Zr II 357.247 nm  | 10.0      | 6.6       | 97              | 102 | 103 | 99  | 103 | 100 | 101 | 102 | 101 | 101 | 104 | 86  | 91  | 93  | 100 | 98  | 96  | 101 |
| Plasma robustness |           |           | 1.5             | 1.5 | 1.5 | 1.4 | 1.5 | 1.5 | 1.5 | 1.5 | 1.4 | 1.4 | 1.5 | 1.4 | 1.4 | 1.5 | 1.5 | 1.5 | 1.4 | 1.5 |

Table S2. The same dataset as in Table S1, but data sorted by increasing total line energy

| Emission Line    | TE, eV | IP, eV | Matrix Elements |     |     |     |     |     |     |     |     |     |     |     |     |     |     |     |     |     |
|------------------|--------|--------|-----------------|-----|-----|-----|-----|-----|-----|-----|-----|-----|-----|-----|-----|-----|-----|-----|-----|-----|
|                  |        |        | Al              | B   | Co  | Cr  | Cu  | Fe  | Mn  | Ni  | Ti  | V   | Zn  | Li  | Na  | K   | Cs  | Mg  | Ca  | Ba  |
| K I 766.491 nm   | 1.6    | 4.3    | 112             | 98  | 101 | 104 | 99  | 100 | 102 | 99  | 101 | 103 | 101 | 131 | 124 | M   | 114 | 107 | 113 | 105 |
| Li I 670.78 nm   | 1.8    | 5.4    | 88              | 102 | 102 | 101 | 101 | 101 | 99  | 101 | 102 | 103 | 101 | M   | 72  | 73  | 87  | 94  | 105 | 103 |
| Na I 588.995 nm  | 2.1    | 5.1    | 97              | 101 | 100 | 100 | 100 | 99  | 98  | 98  | 101 | 100 | 99  | 79  | M   | 85  | 91  | 97  | 104 | 104 |
| Na I 589.592 nm  | 2.1    | 5.1    | 100             | 102 | 102 | 102 | 102 | 102 | 99  | 101 | 103 | 102 | 102 | 82  | M   | 88  | 95  | 99  | 107 | 106 |
| Cr I 425.435 nm  | 2.9    | 6.8    | 90              | 97  | 98  | M   | 100 | 100 | 97  | 99  | 102 | 102 | 99  | 85  | 89  | 90  | 95  | 97  | 94  | 97  |
| Al I 394.401 nm  | 3.1    | 6.0    | M               | 101 | 102 | 101 | 102 | 101 | 100 | 102 | 100 | 101 | 103 | 84  | 90  | 88  | 95  | 98  | 98  | 101 |
| Al I 396.152 nm  | 3.1    | 6.0    | M               | 101 | 100 | 100 | 100 | 100 | 100 | 100 | 101 | 101 | 101 | 83  | 88  | 88  | 94  | 97  | 96  | 99  |
| Mn I 403.076 nm  | 3.1    | 7.4    | 95              | 100 | 99  | 99  | 99  | 98  | M   | 98  | 101 | 100 | 99  | 88  | 91  | 92  | 96  | 97  | 94  | 97  |
| Mo II 379.825 nm | 3.3    | 7.1    | 98              | 100 | 101 | 100 | 101 | 99  | 100 | 101 | 100 | 100 | 102 | 96  | 98  | 97  | 99  | 100 | 99  | 100 |
| Rh I 369.236 nm  | 3.4    | 7.5    | 98              | 101 | 99  | 99  | 100 | 99  | 99  | 99  | 101 | 98  | 100 | 94  | 97  | 96  | 99  | 96  | 97  | 99  |
| Cr I 357.869 nm  | 3.5    | 6.8    | 96              | 102 | 104 | M   | 102 | 103 | 100 | 102 | 99  | 100 | 100 | 93  | 93  | 94  | 98  | 97  | 97  | 100 |
| Ni I 352.454 nm  | 3.5    | 7.6    | 95              | 99  | 97  | 94  | 98  | 98  | 98  | M   | 101 | 99  | 96  | 93  | 98  | 97  | 97  | 93  | 95  | 98  |
| W I 400.875 nm   | 3.5    | 7.9    | 92              | 97  | 98  | 97  | 96  | 97  | 97  | 95  | 98  | 96  | 96  | 94  | 96  | 95  | 95  | 97  | 98  | 99  |
| Rh I 343.489 nm  | 3.6    | 7.5    | 100             | 101 | 101 | 102 | 100 | 101 | 99  | 100 | 100 | 100 | 101 | 96  | 98  | 98  | 102 | 96  | 95  | 102 |
| Cu I 324.754 nm  | 3.8    | 7.7    | 95              | 99  | 100 | 102 | M   | 102 | 100 | 99  | 100 | 102 | 101 | 99  | 102 | 99  | 102 | 99  | 99  | 100 |
| Cu I 327.396 nm  | 3.8    | 7.7    | 99              | 102 | 98  | 101 | M   | 100 | 99  | 98  | 101 | 101 | 99  | 98  | 101 | 100 | 102 | 98  | 99  | 101 |
| Al I 308.215 nm  | 4.0    | 6.0    | M               | 101 | 100 | 97  | 98  | 99  | 99  | 100 | 99  | 100 | 100 | 84  | 89  | 87  | 93  | 97  | 94  | 100 |
| Bi I 306.772 nm  | 4.0    | 7.3    | 88              | 88  | 90  | 89  | 89  | 89  | 88  | 88  | 89  | 88  | 91  | 85  | 87  | 87  | 88  | 87  | 88  | 89  |
| Co I 345.35 nm   | 4.0    | 7.9    | 112             | 105 | M   | 102 | 101 | 100 | 99  | 102 | 102 | 99  | 104 | 97  | 98  | 96  | 98  | 94  | 99  | 101 |
| Pt I 306.471 nm  | 4.0    | 9.0    | 99              | 98  | 99  | 99  | 99  | 98  | 98  | 99  | 99  | 98  | 98  | 96  | 97  | 98  | 97  | 98  | 98  | 100 |
| Co I 344.364 nm  | 4.1    | 7.9    | 101             | 104 | M   | 103 | 100 | 95  | 98  | 101 | 108 | 103 | 104 | 95  | 94  | 90  | 94  | 92  | 103 | 99  |
| Pt I 299.797 nm  | 4.2    | 9.0    | 98              | 100 | 100 | 101 | 101 | 98  | 99  | 100 | 101 | 98  | 100 | 100 | 100 | 100 | 101 | 99  | 98  | 100 |
| Mg I 285.213 nm  | 4.3    | 7.6    | 97              | 101 | 102 | 100 | 102 | 101 | 99  | 100 | 101 | 101 | 103 | 87  | 92  | 92  | 97  | M   | 94  | 99  |
| Pb I 368.346 nm  | 4.3    | 7.4    | 88              | 95  | 94  | 95  | 95  | 95  | 94  | 95  | 96  | 95  | 94  | 81  | 85  | 86  | 91  | 91  | 89  | 92  |
| Pb I 405.778 nm  | 4.4    | 7.4    | 91              | 95  | 94  | 95  | 95  | 93  | 94  | 93  | 96  | 95  | 95  | 84  | 86  | 87  | 91  | 92  | 89  | 93  |
| Pd I 340.458 nm  | 4.5    | 8.3    | 97              | 98  | 102 | 101 | 100 | 101 | 100 | 98  | 102 | 101 | 99  | 96  | 98  | 98  | 98  | 97  | 99  | 99  |
| Pd I 324.27 nm   | 4.6    | 8.3    | 105             | 102 | 100 | 103 | 105 | 104 | 101 | 101 | 103 | 101 | 101 | 97  | 105 | 100 | 103 | 99  | 102 | 101 |
| B I 249.677 nm   | 5.0    | 8.3    | 96              | M   | 103 | 102 | 102 | 100 | 102 | 102 | 102 | 101 | 103 | 102 | 102 | 102 | 103 | 102 | 104 | 104 |
| B I 249.773 nm   | 5.0    | 8.3    | 97              | M   | 103 | 103 | 102 | 101 | 103 | 102 | 103 | 101 | 102 | 102 | 103 | 102 | 102 | 102 | 104 | 103 |
| Be I 234.861 nm  | 5.3    | 9.3    | 99              | 102 | 103 | 102 | 101 | 100 | 102 | 100 | 99  | 99  | 101 | 102 | 102 | 102 | 102 | 100 | 103 | 103 |
| Ni I 232.003 nm  | 5.3    | 7.6    | 99              | 103 | 102 | 99  | 102 | 101 | 98  | M   | 102 | 101 | 100 | 94  | 99  | 99  | 101 | 95  | 100 | 101 |
| Cd I 228.802 nm  | 5.4    | 9.0    | 100             | 101 | 100 | 101 | 101 | 99  | 101 | 100 | 101 | 100 | 101 | 100 | 101 | 99  | 101 | 101 | 100 | 100 |
| Sb I 231.147 nm  | 5.4    | 8.6    | 95              | 97  | 88  | 95  | 98  | 96  | 97  | 98  | 97  | 96  | 97  | 96  | 97  | 94  | 98  | 97  | 96  | 96  |
| Bi I 222.825 nm  | 5.6    | 7.3    | 90              | 91  | 87  | 92  | 89  | 87  | 88  | 90  | 87  | 90  | 90  | 80  | 92  | 83  | 89  | 90  | 88  | 86  |
| Bi I 223.061 nm  | 5.6    | 7.3    | 89              | 90  | 89  | 92  | 90  | 89  | 89  | 89  | 91  | 90  | 91  | 84  | 89  | 86  | 90  | 89  | 87  | 90  |
| Sb I 217.581 nm  | 5.7    | 8.6    | 94              | 97  | 96  | 95  | 96  | 94  | 96  | 97  | 95  | 96  | 97  | 95  | 96  | 95  | 96  | 96  | 95  | 97  |
| Zn I 213.856 nm  | 5.8    | 9.4    | 104             | 103 | 101 | 102 | 102 | 100 | 101 | 100 | 102 | 103 | M   | 102 | 103 | 101 | 102 | 101 | 101 | 102 |
| Sb I 206.833 nm  | 6.0    | 8.6    | 95              | 97  | 97  | 96  | 97  | 93  | 95  | 95  | 97  | 97  | 99  | 95  | 96  | 95  | 97  | 96  | 95  | 97  |

| Emission Line    | TE,<br>eV | IP,<br>eV | Matrix Elements |     |     |     |     |     |     |     |     |     |     |    |    |     |     |     |     |     |
|------------------|-----------|-----------|-----------------|-----|-----|-----|-----|-----|-----|-----|-----|-----|-----|----|----|-----|-----|-----|-----|-----|
|                  |           |           | Al              | B   | Co  | Cr  | Cu  | Fe  | Mn  | Ni  | Ti  | V   | Zn  | Li | Na | K   | Cs  | Mg  | Ca  | Ba  |
| Se I 196.09 nm   | 6.3       | 9.8       | 91              | 97  | 99  | 97  | 94  | 92  | 95  | 96  | 96  | 94  | 96  | 94 | 96 | 98  | 97  | 96  | 98  |     |
| Se I 203.985 nm  | 6.3       | 9.8       | 95              | 98  | 104 | 92  | 95  | 87  | 83  | 88  | 100 | 99  | 99  | 91 | 98 | 96  | 95  | 98  | 96  | 98  |
| As I 193.759 nm  | 6.4       | 9.8       | 98              | 97  | 98  | 95  | 97  | 97  | 97  | 96  | 96  | 96  | 97  | 95 | 97 | 96  | 95  | 97  | 95  | 97  |
| As I 189.042 nm  | 6.6       | 9.8       | 93              | 95  | 96  | 94  | 95  | 93  | 94  | 94  | 94  | 94  | 93  | 94 | 93 | 95  | 93  | 96  | 95  | 95  |
| Ba II 455.404 nm | 7.9       | 5.2       | 91              | 101 | 102 | 99  | 101 | 102 | 98  | 101 | 99  | 102 | 102 | 74 | 80 | 85  | 92  | 96  | 92  | M   |
| Ce II 448.691 nm | 8.6       | 5.5       | 92              | 101 | 100 | 99  | 101 | 99  | 99  | 100 | 101 | 101 | 101 | 76 | 83 | 84  | 92  | 96  | 91  | 97  |
| La II 408.672 nm | 8.6       | 5.6       | 92              | 101 | 102 | 99  | 102 | 100 | 99  | 101 | 100 | 100 | 103 | 76 | 82 | 84  | 92  | 96  | 94  | 100 |
| La II 379.478 nm | 9.1       | 5.6       | 91              | 102 | 102 | 99  | 101 | 100 | 99  | 102 | 100 | 101 | 103 | 74 | 81 | 83  | 92  | 96  | 92  | 99  |
| Ca II 396.847 nm | 9.2       | 6.1       | 92              | 101 | 102 | 98  | 101 | 102 | 98  | 102 | 93  | 104 | 103 | 74 | 75 | 81  | 91  | 93  | M   | 95  |
| Ca II 393.366 nm | 9.3       | 6.1       | 95              | 104 | 106 | 101 | 106 | 103 | 100 | 103 | 94  | 107 | 106 | 75 | 77 | 83  | 94  | 97  | M   | 96  |
| Tb II 370.286 nm | 9.3       | 5.9       | 92              | 100 | 101 | 97  | 101 | 99  | 98  | 100 | 98  | 99  | 100 | 80 | 86 | 88  | 95  | 96  | 91  | 98  |
| Ce II 413.38 nm  | 9.4       | 5.5       | 91              | 100 | 101 | 98  | 101 | 99  | 99  | 100 | 101 | 100 | 101 | 75 | 82 | 84  | 92  | 95  | 91  | 97  |
| Tb II 350.917 nm | 9.4       | 5.9       | 89              | 98  | 94  | 90  | 98  | 94  | 97  | 95  | 100 | 98  | 99  | 76 | 85 | 86  | 90  | 94  | 90  | 95  |
| Y II 377.433 nm  | 9.6       | 6.2       | 93              | 101 | 102 | 99  | 101 | 100 | 99  | 101 | 99  | 100 | 102 | 69 | 87 | 89  | 95  | 95  | 92  | 99  |
| La II 333.749 nm | 9.7       | 5.6       | 89              | 100 | 103 | 100 | 101 | 100 | 99  | 100 | 100 | 101 | 100 | 73 | 81 | 82  | 92  | 95  | 92  | 98  |
| Y II 371.03 nm   | 9.7       | 6.2       | 93              | 101 | 102 | 98  | 102 | 100 | 99  | 101 | 99  | 99  | 102 | 70 | 86 | 89  | 95  | 95  | 92  | 98  |
| Sc II 424.683 nm | 9.8       | 6.6       | 92              | 100 | 100 | 99  | 100 | 99  | 98  | 100 | 98  | 99  | 100 | 76 | 89 | 90  | 96  | 95  | 92  | 98  |
| Tm II 342.508 nm | 9.8       | 6.2       | 91              | 101 | 102 | 98  | 101 | 100 | 99  | 100 | 99  | 99  | 101 | 81 | 88 | 91  | 95  | 96  | 93  | 98  |
| Tm II 346.22 nm  | 9.8       | 6.2       | 94              | 101 | 100 | 97  | 100 | 99  | 99  | 100 | 100 | 99  | 102 | 80 | 88 | 91  | 96  | 96  | 92  | 99  |
| Y II 360.073 nm  | 9.8       | 6.2       | 94              | 103 | 104 | 101 | 103 | 103 | 100 | 103 | 98  | 99  | 102 | 72 | 87 | 90  | 97  | 96  | 94  | 100 |
| Gd II 335.047 nm | 10.0      | 6.1       | 93              | 102 | 102 | 99  | 102 | 99  | 99  | 102 | 100 | 99  | 102 | 80 | 86 | 88  | 94  | 95  | 92  | 98  |
| Gd II 342.247 nm | 10.0      | 6.1       | 93              | 101 | 102 | 99  | 102 | 101 | 99  | 101 | 99  | 101 | 103 | 79 | 86 | 88  | 96  | 95  | 92  | 99  |
| Hf II 339.98 nm  | 10.0      | 6.8       | 96              | 102 | 103 | 103 | 100 | 101 | 101 | 104 | 101 | 102 | 100 | 93 | 97 | 98  | 94  | 99  | 100 | 101 |
| Lu II 261.542 nm | 10.0      | 5.4       | 96              | 101 | 102 | 100 | 101 | 101 | 100 | 101 | 99  | 99  | 103 | 87 | 92 | 94  | 99  | 98  | 95  | 100 |
| Sc II 361.384 nm | 10.0      | 6.6       | 96              | 103 | 102 | 100 | 103 | 101 | 100 | 102 | 100 | 101 | 103 | 77 | 91 | 93  | 99  | 97  | 95  | 100 |
| Sr II 407.771 nm | 10.0      | 5.7       | 88              | 99  | 98  | 96  | 99  | 98  | 96  | 98  | 97  | 95  | 98  | 72 | 79 | 82  | 89  | 92  | 89  | 96  |
| Sr II 421.552 nm | 10.0      | 5.7       | 92              | 103 | 102 | 97  | 102 | 102 | 100 | 102 | 102 | 101 | 104 | 74 | 82 | 84  | 93  | 96  | 93  | 100 |
| Tm II 313.126 nm | 10.0      | 6.2       | 94              | 99  | 100 | 99  | 101 | 100 | 100 | 102 | 99  | 100 | 103 | 83 | 90 | 92  | 98  | 97  | 92  | 100 |
| Zr II 339.198 nm | 10.0      | 6.6       | 96              | 101 | 102 | 100 | 101 | 100 | 100 | 101 | 99  | 100 | 103 | 89 | 94 | 96  | 101 | 98  | 96  | 102 |
| Zr II 343.823 nm | 10.0      | 6.6       | 95              | 100 | 101 | 98  | 100 | 99  | 100 | 100 | 98  | 98  | 101 | 87 | 93 | 95  | 98  | 98  | 95  | 100 |
| Zr II 357.247 nm | 10.0      | 6.6       | 97              | 102 | 103 | 99  | 103 | 100 | 101 | 102 | 101 | 101 | 104 | 86 | 91 | 93  | 100 | 98  | 96  | 101 |
| Ba II 233.527 nm | 11.0      | 5.2       | 90              | 101 | 98  | 97  | 101 | 96  | 98  | 99  | 102 | 101 | 100 | 71 | 82 | 83  | 92  | 96  | 92  | M   |
| Lu II 291.139 nm | 11.0      | 5.4       | 97              | 103 | 103 | 99  | 102 | 99  | 100 | 101 | 100 | 99  | 103 | 87 | 94 | 95  | 101 | 98  | 96  | 100 |
| Lu II 307.76 nm  | 11.0      | 5.4       | 96              | 101 | 100 | 99  | 100 | 100 | 99  | 101 | 99  | 100 | 101 | 86 | 93 | 94  | 99  | 97  | 95  | 100 |
| Nb II 309.418 nm | 11.0      | 6.8       | 94              | 103 | 101 | 100 | 101 | 100 | 100 | 102 | 99  | 96  | 102 | 91 | 98 | 98  | 102 | 100 | 99  | 102 |
| Nb II 313.079 nm | 11.0      | 6.8       | 95              | 102 | 103 | 102 | 104 | 101 | 101 | 102 | 93  | 100 | 103 | 93 | 98 | 100 | 102 | 99  | 99  | 102 |

| Emission Line    | TE,<br>eV | IP,<br>eV | Matrix Elements |     |     |     |     |     |     |     |     |     |     |     |     |     |     |     |     |     |
|------------------|-----------|-----------|-----------------|-----|-----|-----|-----|-----|-----|-----|-----|-----|-----|-----|-----|-----|-----|-----|-----|-----|
|                  |           |           | Al              | B   | Co  | Cr  | Cu  | Fe  | Mn  | Ni  | Ti  | V   | Zn  | Li  | Na  | K   | Cs  | Mg  | Ca  | Ba  |
| Ti II 307.864 nm | 11.0      | 6.8       | 95              | 102 | 100 | 98  | 100 | 100 | 99  | 101 | M   | 99  | 101 | 86  | 93  | 94  | 98  | 98  | 96  | 100 |
| Ti II 334.941 nm | 11.0      | 6.8       | 96              | 101 | 101 | 100 | 101 | 100 | 99  | 101 | M   | 99  | 103 | 87  | 93  | 95  | 101 | 97  | 96  | 102 |
| Ti II 336.121 nm | 11.0      | 6.8       | 92              | 104 | 104 | 101 | 100 | 103 | 100 | 102 | M   | 100 | 101 | 87  | 97  | 96  | 99  | 98  | 99  | 100 |
| V II 292.464 nm  | 11.0      | 6.7       | 96              | 102 | 103 | 99  | 103 | 96  | 99  | 100 | 99  | M   | 101 | 87  | 94  | 95  | 100 | 97  | 97  | 99  |
| V II 309.311 nm  | 11.0      | 6.7       | 96              | 97  | 99  | 99  | 101 | 99  | 100 | 101 | 100 | M   | 103 | 87  | 93  | 97  | 100 | 99  | 96  | 102 |
| V II 311.071 nm  | 11.0      | 6.7       | 96              | 103 | 101 | 99  | 101 | 99  | 101 | 102 | 100 | M   | 102 | 88  | 98  | 95  | 101 | 99  | 98  | 101 |
| Hf II 232.247 nm | 12.0      | 6.8       | 99              | 104 | 103 | 102 | 105 | 103 | 107 | 106 | 103 | 99  | 105 | 100 | 103 | 95  | 105 | 104 | 101 | 100 |
| Mg II 280.27 nm  | 12.0      | 7.6       | 96              | 103 | 103 | 100 | 103 | 101 | 100 | 101 | 100 | 100 | 103 | 84  | 90  | 92  | 97  | M   | 94  | 99  |
| Mn II 257.611 nm | 12.0      | 7.4       | 96              | 104 | 103 | 100 | 102 | 101 | M   | 102 | 100 | 100 | 103 | 84  | 91  | 93  | 98  | 97  | 94  | 100 |
| Mn II 259.373 nm | 12.0      | 7.4       | 98              | 105 | 102 | 101 | 102 | 101 | M   | 102 | 102 | 100 | 103 | 85  | 91  | 94  | 99  | 98  | 96  | 99  |
| Nb II 269.706 nm | 12.0      | 6.8       | 94              | 101 | 101 | 100 | 102 | 100 | 102 | 100 | 100 | 96  | 101 | 91  | 96  | 98  | 101 | 99  | 99  | 98  |
| Ta II 268.517 nm | 12.0      | 7.5       | 96              | 101 | 103 | 101 | 102 | 101 | 103 | 102 | 101 | 99  | 102 | 94  | 99  | 101 | 105 | 100 | 99  | 102 |
| Be II 313.042 nm | 13.0      | 9.3       | 100             | 101 | 100 | 101 | 102 | 100 | 101 | 102 | 98  | 99  | 103 | 99  | 102 | 102 | 104 | 100 | 100 | 104 |
| Ca II 317.933 nm | 13.0      | 6.1       | 85              | 102 | 102 | 97  | 101 | 100 | 99  | 101 | 95  | 101 | 102 | 77  | 81  | 84  | 93  | 95  | M   | 98  |
| Co II 238.892 nm | 13.0      | 7.9       | 97              | 104 | M   | 100 | 103 | 101 | 102 | 101 | 101 | 100 | 102 | 94  | 98  | 100 | 102 | 96  | 98  | 101 |
| Cr II 205.552 nm | 13.0      | 6.8       | 95              | 108 | 106 | M   | 103 | 100 | 99  | 103 | 104 | 105 | 107 | 87  | 93  | 91  | 99  | 99  | 97  | 102 |
| Cr II 267.716 nm | 13.0      | 6.8       | 94              | 102 | 104 | M   | 100 | 97  | 95  | 102 | 97  | 101 | 103 | 81  | 92  | 90  | 96  | 95  | 91  | 95  |
| Cr II 283.563 nm | 13.0      | 6.8       | 94              | 102 | 102 | M   | 102 | 96  | 97  | 100 | 98  | 99  | 102 | 82  | 89  | 89  | 96  | 95  | 93  | 96  |
| Fe II 238.204 nm | 13.0      | 7.9       | 98              | 104 | 102 | 99  | 102 | M   | 101 | 102 | 100 | 100 | 102 | 92  | 96  | 97  | 100 | 99  | 98  | 100 |
| Fe II 239.562 nm | 13.0      | 7.9       | 98              | 105 | 100 | 101 | 103 | M   | 103 | 101 | 102 | 100 | 103 | 92  | 97  | 101 | 102 | 99  | 99  | 101 |
| Fe II 259.941 nm | 13.0      | 7.9       | 98              | 103 | 102 | 100 | 102 | M   | 100 | 101 | 100 | 100 | 102 | 91  | 97  | 98  | 101 | 98  | 97  | 101 |
| Hf II 264.141 nm | 13.0      | 6.8       | 104             | 105 | 104 | 105 | 104 | 103 | 104 | 104 | 104 | 103 | 104 | 95  | 102 | 103 | 106 | 103 | 104 | 104 |
| Mo II 202.03 nm  | 13.0      | 7.1       | 101             | 105 | 104 | 108 | 108 | 107 | 112 | 110 | 100 | 101 | 103 | 96  | 106 | 106 | 102 | 104 | 104 | 103 |
| Mo II 281.615 nm | 13.0      | 7.1       | 97              | 101 | 104 | 100 | 103 | 99  | 101 | 100 | 99  | 99  | 103 | 92  | 97  | 97  | 102 | 98  | 98  | 101 |
| Ta II 240.063 nm | 13.0      | 7.5       | 92              | 102 | 101 | 102 | 99  | 96  | 103 | 101 | 101 | 100 | 105 | 92  | 99  | 100 | 100 | 101 | 100 | 96  |
| Cd II 226.502 nm | 14.0      | 9.0       | 99              | 103 | 103 | 99  | 102 | 100 | 103 | 102 | 100 | 100 | 102 | 100 | 101 | 100 | 104 | 102 | 99  | 101 |
| Co II 228.616 nm | 14.0      | 7.9       | 102             | 106 | M   | 101 | 102 | 102 | 101 | 101 | 101 | 102 | 104 | 94  | 99  | 100 | 104 | 97  | 99  | 105 |
| W II 239.709 nm  | 14.0      | 7.9       | 99              | 105 | 98  | 106 | 97  | 108 | 98  | 97  | 102 | 100 | 97  | 96  | 97  | 112 | 109 | 100 | 100 | 106 |
| Cd II 214.438 nm | 15.0      | 9.0       | 100             | 103 | 101 | 102 | 103 | 101 | 103 | 103 | 101 | 101 | 102 | 98  | 100 | 101 | 102 | 101 | 102 | 103 |
| Zn II 206.191 nm | 15.0      | 9.4       | 102             | 105 | 102 | 100 | 98  | 99  | 93  | 98  | 101 | 103 | M   | 99  | 100 | 103 | 102 | 100 | 99  | 105 |
| Zn II 202.548 nm | 16.0      | 9.4       | 98              | 105 | 100 | 98  | 102 | 99  | 96  | 102 | 99  | 102 | M   | 97  | 100 | 99  | 101 | 97  | 98  | 101 |
